# Supplementary figures and images for: Water binding energies of [Pb(amino acid-H)H2O]+ complexes determined by blackbody infrared radiative dissociation
Source: Royal Society of Chemistry journal article supplement (doi:10.1039/c2cp41440f), 2012-01-01

Figure S1 (top half)

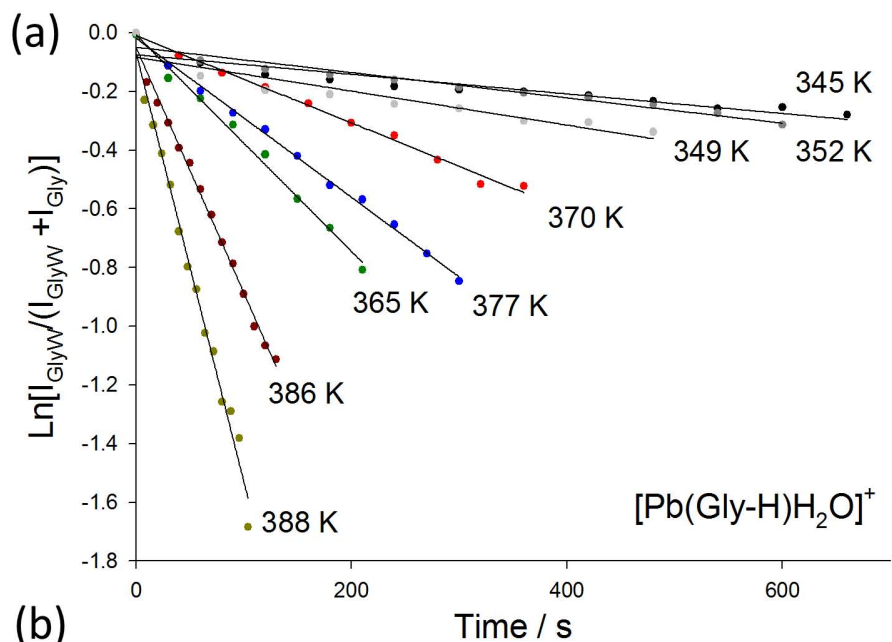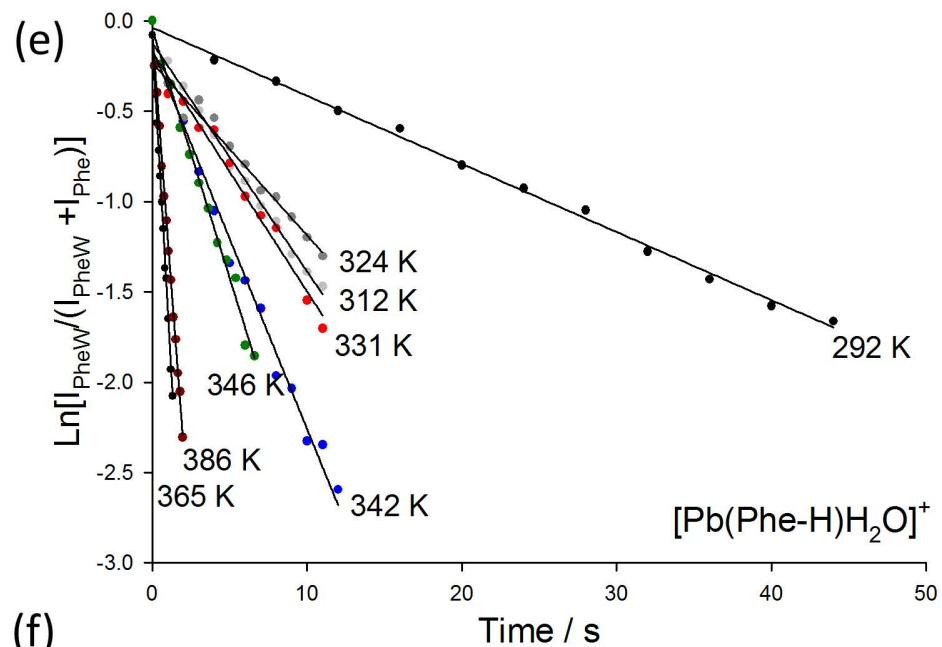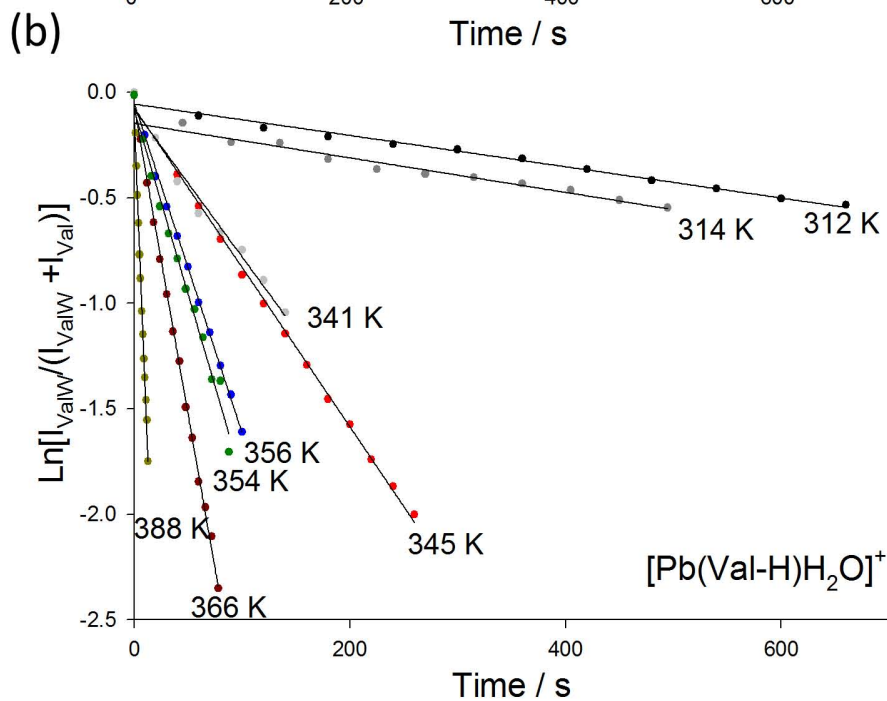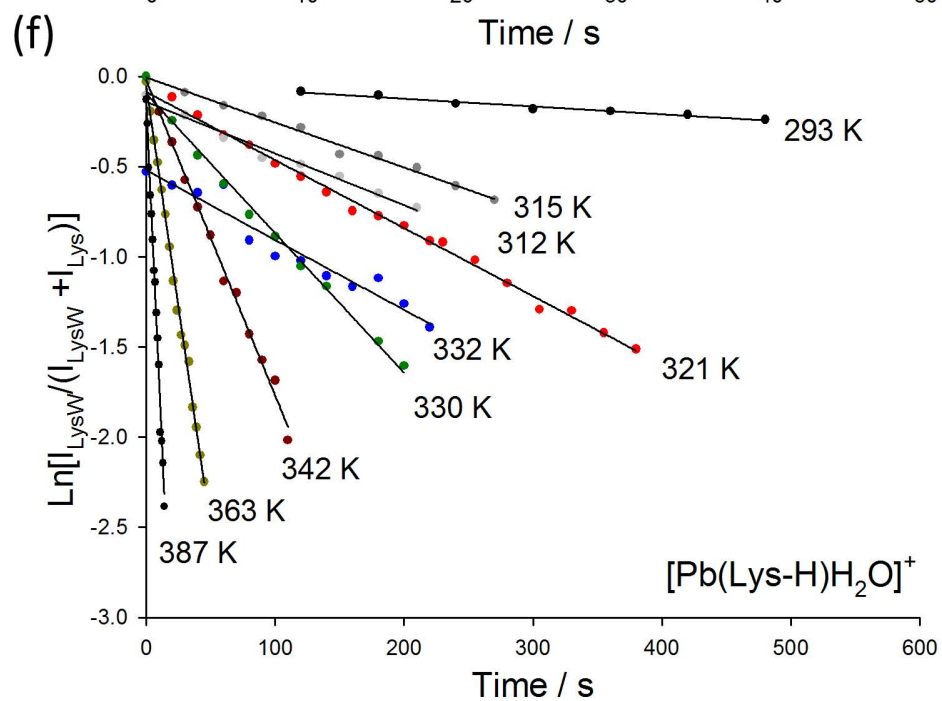

Figure S7 (bottom half)

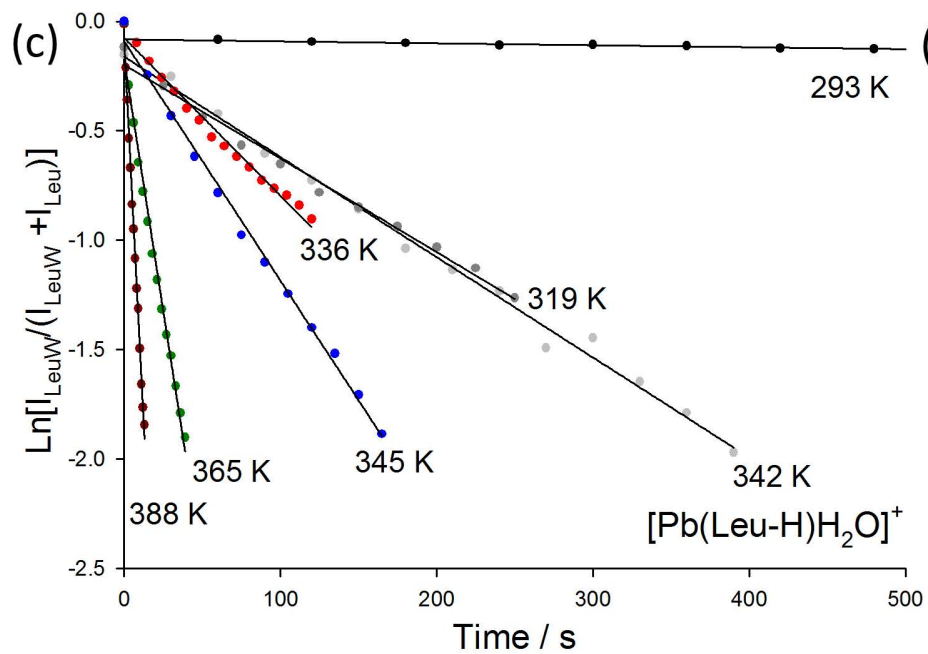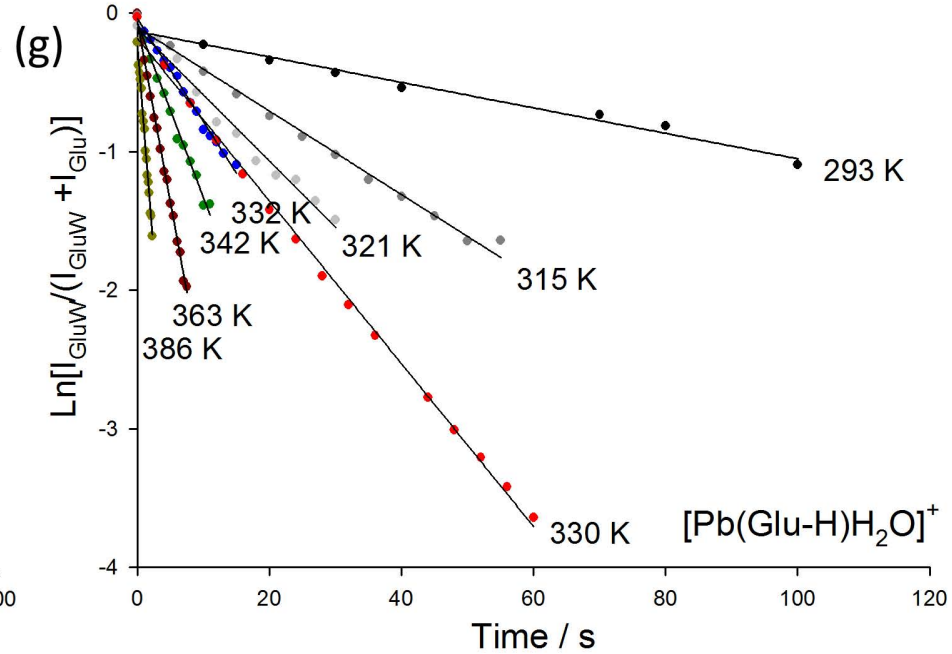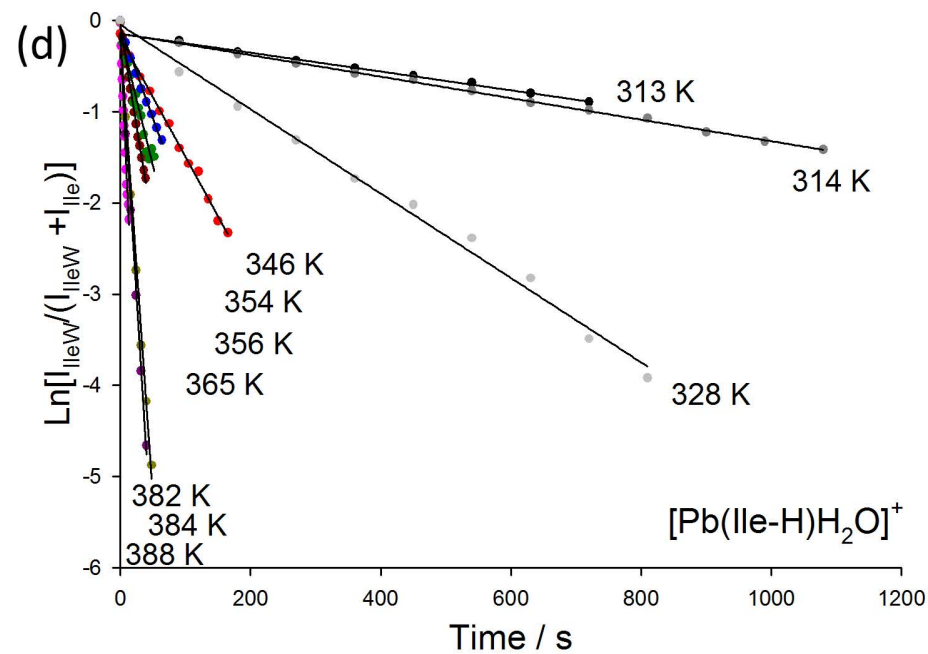

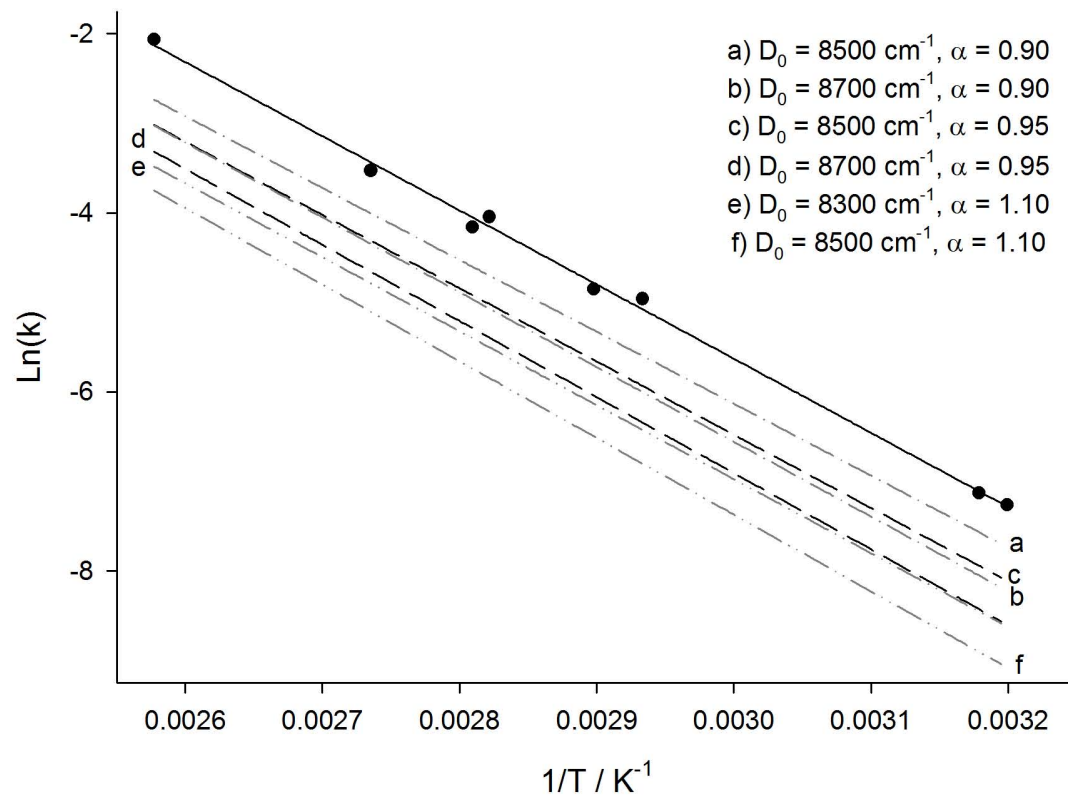

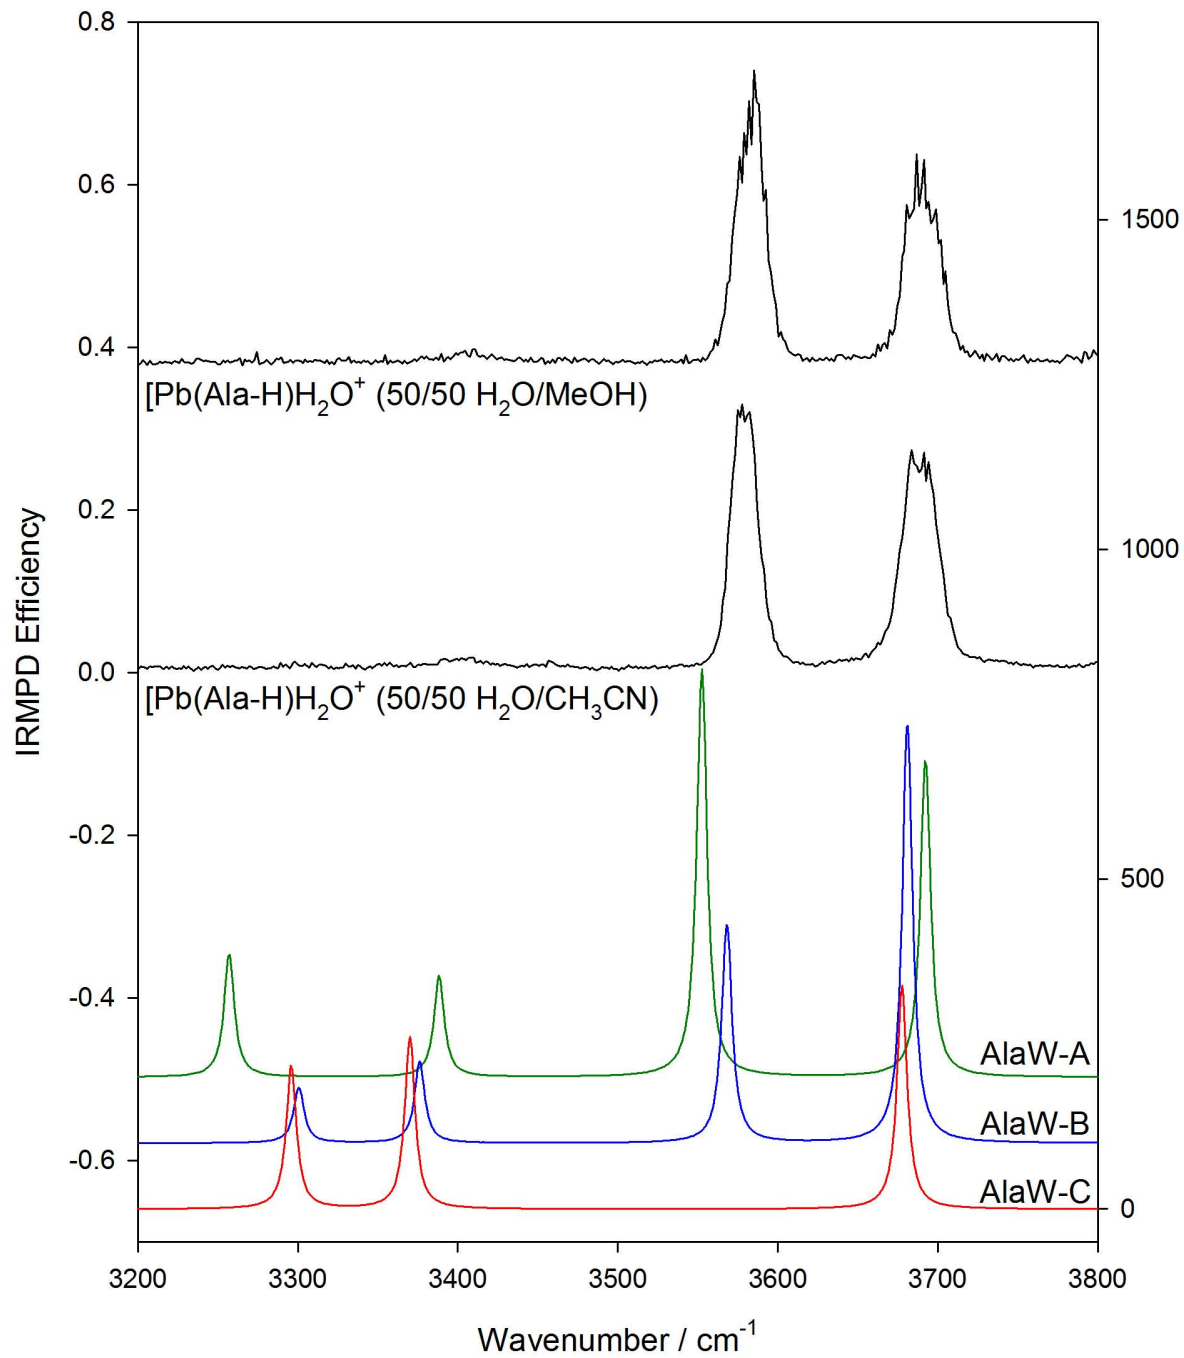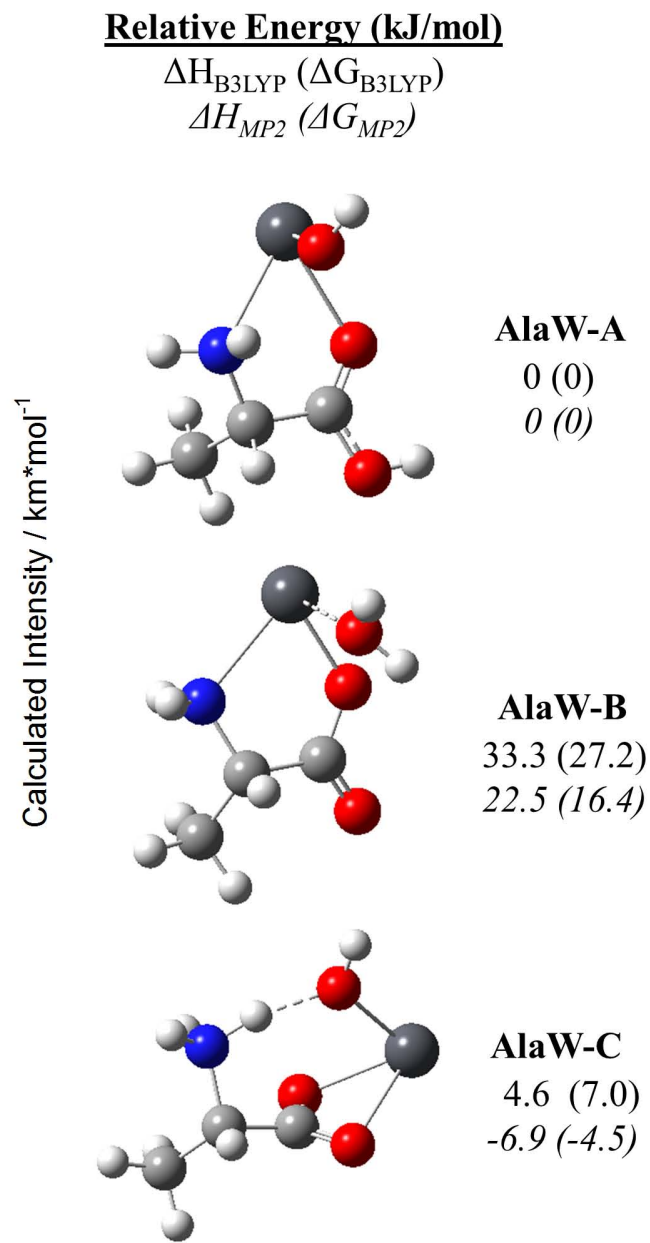

Supplement: c2cp41440f.pdf [file c2cp41440f.pdf]
